# Supplementary material
Source: Springer Nature journal article supplement (https://www.springermedizin.de/resource/supplementary/13046_2009_152_MOESM2_ESM.pdf/9661740)

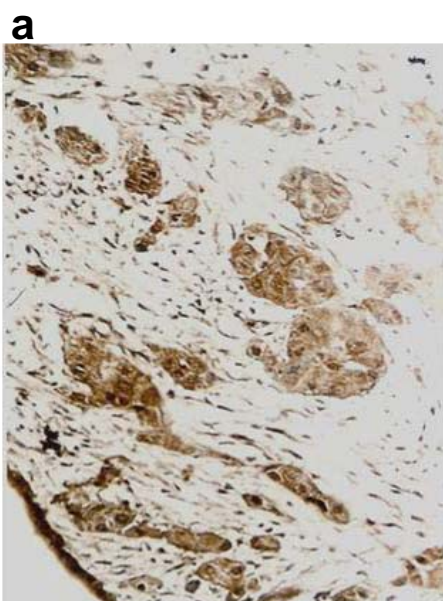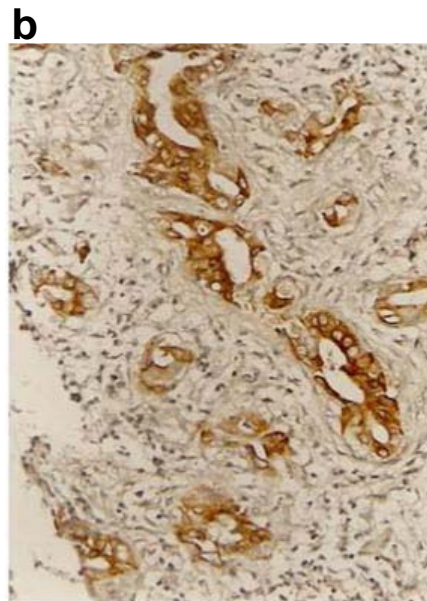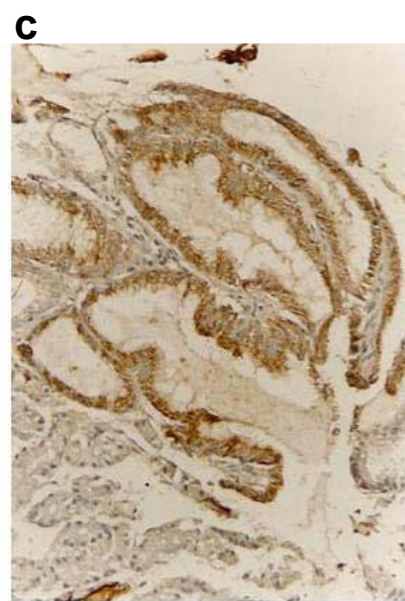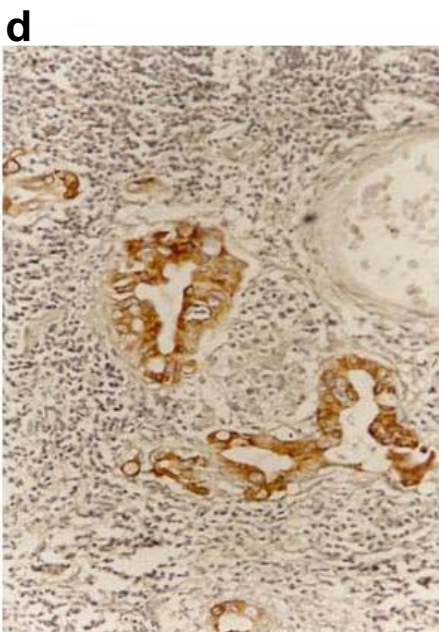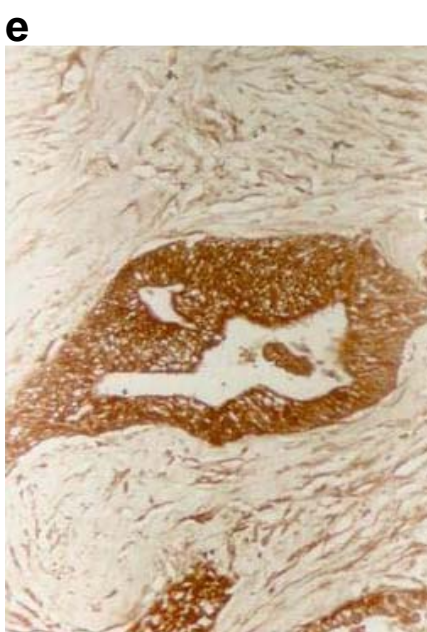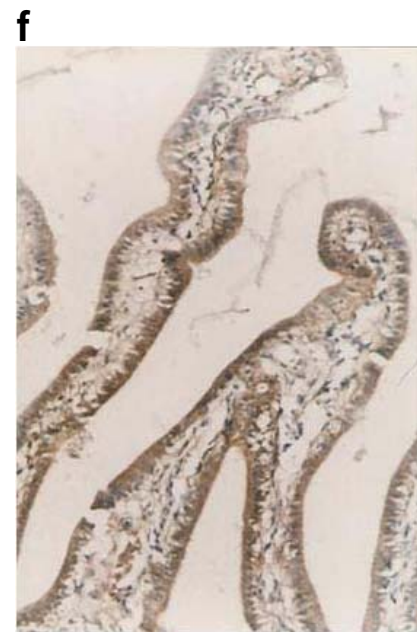

Supplement: MOESM2 [file 9661740]
